# Supplementary material for: The genetic architecture of colonization resistance in Brachypodium distachyon to non-adapted stripe rust (Puccinia striiformis) isolates
Source: PLoS Genet. 2018 Sep 28;14(9):e1007637. doi: 10.1371/journal.pgen.1007637 (PMC6161849; doi:10.1371/journal.pgen.1007637)
Supplement: S9 File — (XLSX) [file pgen.1007637.s020.xlsx]

## Sheet: File S9
File S9. Luc1 x Jer1 genetic map.
Marker	Chromosome	cM	F2 lines
			1	2	3	4	5	6	7	8	9	10	11	12	13	14	15	16	17	18	19	20	21	22	23	24	25	26	27	28	29	30	31	32	33	34	35	36	37	38	39	40	41	42	43	44	45	46	47
Bd1_1045_80_F	Bd1	0	A	A	H	H	A	A	B	B	A	B	H	B	H	B	H	A	A	A	A	A	B	H	B	H	A	B	A	A	H	H	H	H	H	B	H	B	A	A	A	B	A	B	H	A	A	H	H
Bd1_1155371_80_F	Bd1	9	A	A	H	H	A	A	B	B	A	B	H	H	H	B	H	A	A	H	A	A	B	H	B	H	A	B	A	B	B	H	A	H	H	B	H	A	A	A	A	B	A	B	H	A	A	H	H
Bd1_2216334_80_F	Bd1	25.58	A	H	H	H	B	H	B	H	A	B	H	H	-	B	H	A	H	H	A	H	B	H	H	H	B	B	A	B	B	H	A	H	A	H	H	A	A	A	H	H	H	A	A	A	H	H	B
Bd1_3741412_80_F	Bd1	43.82	A	H	H	H	B	H	H	H	A	B	A	H	A	B	H	A	H	H	H	H	B	A	H	B	B	H	A	B	B	H	A	A	A	A	H	A	A	A	H	A	H	A	H	H	B	H	B
Bd1_5185742_80_F	Bd1	58.11	A	H	H	H	B	H	H	B	A	H	A	H	-	B	H	H	H	H	A	A	H	A	H	B	H	H	A	H	H	H	A	A	A	A	H	A	H	A	H	A	H	A	H	H	B	H	H
Bd1_6500139_80_F	Bd1	68.42	A	H	H	H	B	A	H	B	A	H	A	H	A	B	H	B	H	B	A	A	H	A	H	B	H	H	H	H	H	H	A	A	A	A	H	A	H	H	H	A	H	A	H	B	B	H	H
Bd1_8474681_80_F	Bd1	81.28	A	H	A	H	B	A	A	H	H	H	A	H	-	H	H	B	B	B	A	A	H	H	H	H	A	H	H	H	H	H	H	A	H	A	H	A	H	H	H	H	A	A	H	B	B	H	H
Bd1_10586106_80_F	Bd1	93.18	A	A	A	A	H	A	A	H	H	A	A	H	A	H	A	H	B	B	A	A	H	H	H	H	A	H	H	H	A	B	H	H	H	A	H	A	H	H	H	H	A	A	H	H	H	H	H
Bd1_14340196_80_F	Bd1	104.2	A	A	A	A	H	H	H	H	H	H	A	H	-	H	H	H	H	B	A	A	H	H	H	H	A	H	H	H	A	H	H	H	H	A	H	H	H	H	H	A	A	H	H	H	H	H	H
Bd1_16450146_80_R	Bd1	120.95	H	A	A	H	H	H	H	H	H	H	H	B	A	H	A	H	H	B	A	A	B	H	H	H	A	A	A	H	A	H	H	H	H	A	H	B	H	B	H	A	A	H	H	A	H	B	B
Bd1_18483078_80_F	Bd1	130.49	A	A	A	H	H	B	H	H	H	H	H	B	A	H	A	H	H	H	A	A	B	H	H	H	H	H	A	H	A	H	B	H	H	A	H	B	B	B	H	A	A	H	H	A	A	B	B
Bd1_20796637_80_R	Bd1	140.91	A	A	A	H	H	B	H	B	H	H	H	B	A	H	A	H	A	A	A	A	H	B	H	H	H	H	A	H	A	H	B	A	H	A	H	B	B	B	H	A	A	H	B	A	A	B	B
Bd1_22282569_80_F	Bd1	152	A	A	H	H	H	B	H	H	H	H	B	B	-	H	A	B	A	A	A	A	A	B	H	H	H	H	A	H	A	B	B	A	H	A	B	B	B	H	A	H	A	H	B	A	A	B	B
Bd1_25416267_80_F	Bd1	166.29	H	A	H	H	B	H	H	H	H	H	B	B	A	H	A	B	A	A	A	B	A	B	H	H	H	B	B	H	A	B	H	A	H	A	B	B	B	A	A	H	A	H	H	A	A	H	B
Bd1_30597512_80_F	Bd1	181.62	H	H	B	H	B	H	B	H	H	H	B	H	A	H	A	B	A	A	A	B	H	H	B	B	H	H	B	H	H	B	H	A	H	H	B	B	B	A	A	H	H	H	H	A	H	H	B
Bd1_33970716_80_F	Bd1	202.96	H	A	H	A	H	H	H	A	A	H	H	H	-	B	A	B	A	A	H	B	H	H	B	H	H	H	B	H	H	H	H	A	H	B	B	H	B	H	H	H	H	B	H	A	H	H	H
Bd1_43701469_80_F	Bd1	217.56	H	A	A	A	H	H	H	H	H	H	H	A	B	B	H	H	H	A	H	B	H	H	H	A	H	B	B	H	H	H	H	A	H	B	B	H	B	H	H	H	H	B	H	A	H	H	H
Bd1_46852901_80_F	Bd1	232.77	H	A	A	A	H	A	A	H	B	H	A	A	H	B	H	H	H	A	B	B	H	B	A	A	B	H	B	H	H	B	B	H	H	B	B	H	H	H	B	A	H	B	H	A	H	H	H
Bd1_50115953_80_F	Bd1	251.03	B	A	H	A	A	A	A	H	B	H	H	H	B	B	B	H	H	A	B	B	H	B	A	A	H	H	B	H	H	H	B	A	H	A	B	A	A	H	B	H	H	B	B	A	B	A	H
Bd1_52697507_80_F	Bd1	258.84	B	A	A	A	A	H	A	H	B	H	H	H	B	B	B	H	H	H	B	B	H	B	A	A	H	H	B	B	H	H	B	A	H	A	B	A	A	H	B	H	H	B	H	H	B	H	B
Bd1_55161754_80_F	Bd1	275.06	B	H	A	A	A	H	H	H	B	H	H	H	B	B	H	H	H	H	H	B	A	H	A	A	B	H	H	B	H	H	B	A	H	A	B	H	A	H	B	H	H	B	H	H	B	H	B
Bd1_57716091_80_F	Bd1	285.29	H	H	A	A	A	H	B	H	B	H	H	H	B	H	H	H	H	H	H	B	H	H	A	A	B	H	A	B	H	H	H	A	H	A	H	H	A	H	B	H	H	B	H	H	B	H	B
Bd1_59993500_80_R	Bd1	291.92	H	H	A	A	A	B	H	H	B	H	H	H	B	H	H	H	H	H	H	H	H	H	A	A	B	H	A	B	H	H	H	H	H	A	H	B	A	H	B	H	H	B	H	H	B	H	B
Bd1_62217962_80_F	Bd1	306.14	B	H	A	A	H	B	H	H	B	H	H	H	B	H	H	H	H	A	H	H	H	H	H	A	H	B	H	H	H	H	H	H	H	A	H	B	A	H	A	H	H	B	H	H	B	H	H
Bd1_64661845_80_F	Bd1	318.72	B	H	A	A	H	B	H	H	B	H	H	H	B	H	H	B	H	H	H	H	H	H	H	A	H	B	B	H	H	H	A	H	B	A	H	B	H	H	A	H	H	B	H	H	B	H	H
Bd1_66134909_80_F	Bd1	326.61	B	H	A	A	H	B	H	A	B	H	A	H	-	H	H	H	H	H	H	H	H	B	H	A	H	H	B	H	H	H	A	H	B	A	A	B	H	H	A	H	B	B	H	H	B	H	H
Bd1_68027450_80_F	Bd1	342.61	B	H	H	A	H	B	H	A	B	H	H	H	H	A	H	H	H	H	B	H	H	A	A	A	H	H	B	H	A	B	A	H	H	A	B	B	B	H	A	A	B	H	H	H	B	H	H
Bd1_69391018_80_F	Bd1	354.27	B	H	-	A	H	A	A	A	B	H	H	H	A	A	H	H	H	B	B	B	H	A	A	H	A	H	B	H	A	B	H	H	H	A	B	B	H	A	A	H	B	H	H	H	B	H	H
Bd1_70642508_80_F	Bd1	365.58	B	H	H	B	H	A	H	H	B	H	H	B	A	A	H	H	H	B	H	B	H	A	H	H	A	H	H	A	A	B	B	B	A	A	B	B	H	B	A	H	B	H	B	B	B	H	H
Bd1_72025288_80_F	Bd1	377.11	B	H	B	B	B	H	H	H	B	H	H	B	A	A	H	H	B	B	H	B	H	A	H	A	A	H	H	A	A	H	B	B	A	A	B	B	H	B	A	H	H	H	B	B	B	B	H
Bd1_73236996_80_F	Bd1	392.32	H	H	B	B	B	H	A	H	B	H	H	H	-	A	H	H	B	B	H	B	H	A	B	A	A	H	H	A	H	H	B	B	A	A	H	H	H	B	A	H	H	H	B	B	B	B	B
Bd1_74543572_80_F	Bd1	405.71	H	B	B	B	B	H	A	H	H	A	H	B	A	A	A	A	B	B	H	B	H	A	B	A	A	H	H	A	H	H	B	H	A	H	H	H	H	B	A	H	H	A	B	B	B	B	B
Bd2_1031384_80_F	Bd2	0	H	A	A	H	B	B	H	A	H	H	H	B	A	H	A	H	A	H	H	H	H	A	B	H	H	H	H	H	A	A	H	H	B	A	H	H	H	B	A	H	A	A	A	A	H	H	H
Bd2_2025569_80_F	Bd2	10.75	H	A	A	H	B	B	H	A	H	H	H	B	B	H	A	A	A	H	B	H	A	A	B	H	H	B	H	H	H	A	H	H	B	A	H	H	H	B	A	H	A	A	A	A	B	H	H
Bd2_3057799_80_F	Bd2	24.71	H	H	A	H	B	B	H	A	H	H	H	H	B	H	A	H	A	A	B	H	A	A	B	H	A	H	H	H	H	A	H	A	H	H	H	H	H	B	H	B	A	H	A	A	B	A	H
Bd2_4217509_80_F	Bd2	41.38	H	B	A	H	B	B	H	A	H	H	A	A	-	H	H	H	A	A	B	H	B	H	H	A	A	H	H	A	B	A	H	A	H	H	B	H	H	B	H	B	H	H	A	H	B	H	A
Bd2_5518731_80_F	Bd2	56.97	H	B	B	H	B	B	B	A	H	H	H	H	H	H	H	H	A	A	H	H	B	H	A	A	H	H	H	A	B	H	H	A	A	H	B	H	H	A	H	B	H	H	A	B	B	H	H
Bd2_7899070_80_F	Bd2	72.55	H	B	B	H	B	H	H	B	H	H	B	H	-	H	H	A	A	A	H	H	B	H	A	B	H	H	H	A	B	H	A	A	A	B	A	H	H	A	H	H	H	H	H	B	B	H	H
Bd2_9598497_80_R	Bd2	88.16	H	A	B	H	B	H	H	B	H	A	H	H	H	B	H	H	A	A	H	A	B	H	H	B	H	H	H	A	B	H	A	A	H	B	A	H	H	A	B	H	H	H	H	H	B	H	H
Bd2_16667877_80_F	Bd2	112.86	H	A	B	A	H	H	H	B	B	A	H	B	A	B	A	H	H	H	A	H	B	A	H	B	H	H	H	A	B	H	A	A	H	B	A	A	H	A	H	B	B	H	H	H	H	H	B
Bd2_18763621_80_F	Bd2	131.79	H	A	H	A	H	H	H	H	H	A	H	H	-	B	A	H	A	H	A	B	B	A	H	B	H	A	H	B	H	H	A	A	A	B	H	A	B	H	A	B	B	A	B	H	H	H	B
Bd2_26127616_80_F	Bd2	152.1	H	H	H	A	A	H	H	A	H	A	H	H	B	B	H	H	H	H	H	B	B	A	B	H	B	H	H	B	B	H	B	A	A	B	B	H	B	H	A	B	B	H	B	H	H	H	B
Bd2_34878687_80_F	Bd2	174.59	H	H	H	A	A	H	H	A	H	H	H	B	-	B	H	H	B	A	H	B	H	A	B	H	B	H	H	H	B	A	H	A	A	H	B	H	B	H	H	B	H	H	B	H	H	H	H
Bd2_36750036_80_F	Bd2	182.74	H	H	H	A	A	H	H	A	H	H	H	B	B	H	H	H	B	A	H	H	A	A	B	H	B	H	H	H	B	A	H	H	A	H	B	H	B	H	H	B	H	H	B	H	H	H	H
Bd2_38677627_80_F	Bd2	198.75	A	H	H	A	H	H	H	A	A	H	H	B	B	H	H	A	B	H	H	H	A	A	H	H	B	H	H	H	B	H	H	H	A	H	B	A	B	H	H	B	H	H	H	B	H	H	H
Bd2_40663395_80_F	Bd2	206.28	A	H	H	H	H	A	H	A	H	H	H	B	-	B	H	A	B	H	H	H	A	A	H	B	B	H	H	A	B	B	H	H	A	H	B	A	B	H	H	H	H	H	H	B	H	H	H
Bd2_43969308_80_F	Bd2	221.96	H	H	B	H	H	A	H	A	H	H	H	B	H	B	B	A	H	H	A	A	A	A	B	H	H	H	H	A	B	B	H	H	H	H	B	A	B	H	H	H	A	H	H	B	H	B	H
Bd2_46488689_80_R	Bd2	235.71	B	H	B	A	H	A	B	B	H	H	B	B	-	B	B	A	H	H	A	H	H	A	B	B	A	H	A	A	H	B	H	H	H	A	B	A	A	H	H	B	A	B	H	B	H	B	H
Bd2_47854329_80_F	Bd2	244.13	B	H	B	H	H	H	B	H	H	H	B	B	H	B	B	A	H	B	A	H	B	A	B	B	A	B	A	A	H	B	B	H	H	A	B	A	A	H	H	B	A	B	H	H	H	B	H
Bd2_50537426_80_R	Bd2	254.62	B	H	B	H	H	H	H	H	H	H	B	B	H	B	B	A	H	B	A	H	B	A	B	B	A	B	A	A	H	B	B	H	H	H	B	H	A	H	H	B	A	B	A	H	H	B	B
Bd2_51552779_60_F	Bd2	261.29	B	H	B	H	H	H	H	B	H	B	H	B	H	B	B	A	H	B	A	H	B	H	B	B	A	B	A	H	B	B	B	H	H	H	H	H	A	A	H	B	A	B	A	H	H	B	B
Bd2_52758681_80_F	Bd2	268.85	B	H	B	H	A	H	B	B	H	B	H	B	H	B	B	A	H	H	A	H	B	H	B	B	A	B	A	H	B	H	B	H	H	B	H	H	A	A	H	B	A	B	A	H	A	B	B
Bd2_54211637_80_F	Bd2	285.34	B	H	B	H	H	B	H	H	H	H	H	B	H	H	B	A	B	H	A	A	B	H	B	H	A	H	A	H	B	H	B	H	H	B	A	H	A	A	H	B	A	B	H	H	A	B	B
Bd2_55339823_80_F	Bd2	292.57	H	H	B	H	H	B	H	H	A	H	H	B	A	A	H	A	B	H	A	A	B	B	B	H	H	H	A	H	B	H	B	H	H	B	A	H	A	A	H	H	A	B	A	H	A	B	B
Bd2_56818108_80_F	Bd2	307.21	H	H	A	A	H	B	H	H	A	B	H	B	-	A	H	A	B	H	A	A	B	B	B	H	H	B	H	H	H	H	B	H	H	B	H	H	B	A	H	H	H	B	A	H	A	B	H
Bd2_57913042_80_F	Bd2	321.68	H	H	A	H	B	B	H	H	B	B	H	B	A	A	H	A	H	H	H	-	B	H	B	H	H	B	H	A	H	H	H	H	A	H	H	B	B	H	H	H	H	B	H	H	A	B	B
Bd2_59085092_80_F	Bd2	332.36	H	H	A	H	B	H	H	H	B	B	H	H	H	A	H	A	H	H	H	A	B	H	B	H	H	B	H	A	H	H	H	A	A	B	H	B	B	H	H	H	H	B	H	H	H	B	B
Bd3_61604_80_F	Bd3	0	B	B	H	A	H	H	H	B	B	B	A	A	-	A	H	B	H	H	H	A	H	A	A	A	H	H	H	H	H	A	H	B	B	H	B	H	H	A	H	H	A	A	H	A	H	H	H
Bd3_696009_80_F	Bd3	4.67	B	B	H	H	H	H	H	B	B	B	A	A	A	A	H	B	H	H	H	A	H	A	A	A	H	H	A	H	H	A	H	B	B	H	B	H	B	A	H	H	A	A	H	A	H	H	H
Bd3_2967324_80_F	Bd3	27.65	B	B	H	B	A	H	H	B	B	B	A	H	H	A	H	B	H	H	H	A	H	A	A	A	A	H	A	H	H	A	B	H	B	H	H	H	A	A	H	H	A	A	B	A	H	A	H
Bd3_4042494_80_F	Bd3	38.44	B	B	H	B	A	H	A	B	H	B	A	H	-	A	H	B	H	H	B	B	B	A	A	A	A	H	A	H	H	A	B	H	B	H	H	A	A	B	H	H	A	A	B	A	H	A	B
Bd3_5185443_80_R	Bd3	54.14	H	H	H	B	A	H	H	H	H	B	H	H	H	A	H	H	A	B	B	-	B	H	A	A	A	H	A	H	H	H	B	H	H	H	H	A	H	B	B	H	H	H	B	A	H	H	B
Bd3_6306064_80_F	Bd3	63.5	H	H	H	B	A	H	H	H	H	H	B	H	H	A	H	H	A	H	B	B	B	H	H	A	A	H	H	H	A	H	B	A	H	H	H	A	H	B	B	A	H	H	H	A	H	H	H
Bd3_11325380_80_F	Bd3	82.03	H	H	A	B	A	H	A	H	H	A	B	H	-	H	B	B	H	H	H	B	B	H	H	A	H	H	H	A	H	H	B	A	A	A	A	A	H	H	B	A	H	A	H	A	H	H	H
Bd3_13573970_80_F	Bd3	99.1	H	H	A	B	B	A	A	-	H	H	B	B	B	H	B	A	H	H	B	B	H	H	A	A	B	H	H	H	H	H	H	H	A	-	H	A	H	H	B	A	H	A	A	H	H	H	A
Bd3_14520041_80_F	Bd3	112.06	H	B	A	B	B	A	A	H	H	H	B	H	-	A	B	A	H	H	H	B	B	B	A	A	B	H	H	H	H	H	B	H	H	H	H	A	H	H	B	H	H	A	A	A	H	H	A
Bd3_21811231_80_F	Bd3	133.41	H	B	A	H	B	A	A	B	B	H	H	A	-	A	H	A	B	H	H	B	H	B	A	A	B	B	B	A	H	A	B	H	H	H	B	H	H	H	B	H	H	A	A	A	B	H	A
Bd3_32805305_80_F	Bd3	149.82	H	H	A	B	B	H	A	B	B	H	A	B	H	A	H	A	B	H	H	B	A	B	A	A	B	B	B	A	H	A	B	H	H	B	B	H	A	H	H	H	H	H	A	H	B	A	A
Bd3_36807895_80_F	Bd3	170.98	B	A	H	B	-	H	A	B	B	H	A	-	-	H	B	A	B	B	H	H	A	H	-	H	-	B	H	A	H	A	H	B	A	-	H	B	A	H	A	H	H	H	-	A	A	A	-
Bd3_40397170_80_R	Bd3	191.68	B	A	H	B	H	H	B	B	A	H	A	B	H	H	B	H	B	B	A	H	A	A	H	A	H	H	H	A	B	A	H	B	A	B	A	B	H	H	H	A	H	A	H	A	A	A	H
Bd3_41420274_80_F	Bd3	198.05	B	A	H	B	H	A	B	B	A	H	A	B	-	H	B	H	B	B	A	H	A	A	B	A	H	H	H	A	H	H	H	B	A	B	A	B	H	A	H	A	H	A	H	A	A	A	H
Bd3_43701471_80_F	Bd3	219.49	B	A	H	H	H	H	B	B	A	H	H	B	H	H	H	H	B	B	A	H	B	A	B	A	H	A	B	A	H	H	B	B	A	H	A	A	H	H	H	A	H	A	H	H	A	H	H
Bd3_46031645_80_F	Bd3	224.69	B	A	H	H	H	H	B	B	H	H	H	B	H	H	H	H	H	B	A	H	B	A	B	A	H	A	B	A	H	H	B	B	A	H	A	A	H	H	H	A	H	A	H	H	A	H	H
Bd3_48875846_80_F	Bd3	238.48	B	H	A	H	H	H	H	B	H	B	A	B	-	H	A	H	H	H	H	H	B	A	B	A	H	H	H	H	H	A	B	B	A	H	A	A	H	H	H	A	H	H	H	H	A	H	H
Bd3_51830916_80_F	Bd3	257.58	B	B	A	A	H	H	H	B	B	B	H	B	H	H	H	A	H	A	B	H	B	H	B	A	A	B	H	H	H	H	B	B	H	H	A	H	H	H	H	A	A	H	H	H	A	H	A
Bd3_52886096_80_F	Bd3	268.73	B	B	A	A	H	H	H	B	B	B	H	H	H	H	H	A	H	A	B	H	B	H	B	A	A	H	H	H	H	H	B	H	H	A	A	H	H	H	H	A	H	H	A	H	H	H	H
Bd3_54803272_80_F	Bd3	284.37	B	B	H	A	H	A	H	B	B	B	H	A	H	H	H	A	A	H	B	H	H	H	H	A	A	H	B	B	H	H	B	H	H	H	A	H	H	A	H	A	B	H	A	H	H	H	H
Bd3_55829909_80_F	Bd3	296.07	B	H	H	A	A	A	A	H	B	B	H	A	H	H	B	A	A	H	B	H	H	H	A	H	A	B	H	B	A	H	B	H	H	H	H	H	A	A	H	H	B	B	A	H	H	H	H
Bd3_56852080_80_F	Bd3	304.18	H	A	H	A	A	A	A	H	B	B	H	A	-	H	B	A	A	H	B	B	H	H	A	H	A	B	H	B	A	H	B	H	H	A	H	H	A	A	H	H	B	B	H	H	H	H	H
Bd3_58102221_80_F	Bd3	315.64	A	A	A	A	A	A	H	B	H	H	H	A	H	H	B	A	A	H	B	B	H	H	A	H	A	B	B	B	A	H	B	H	B	H	H	H	A	A	H	H	B	B	H	H	H	A	H
Bd3_59338090_80_F	Bd3	327.07	H	A	A	A	A	H	H	B	H	A	H	A	H	H	B	H	A	H	H	B	H	B	H	H	A	B	B	B	A	H	B	B	B	H	H	B	A	A	B	A	B	B	B	H	B	A	H
Bd4_80101_80_F	Bd4	0	H	B	H	A	H	H	B	A	B	B	A	H	A	B	A	H	H	A	B	B	H	B	H	A	B	B	H	A	A	B	H	B	A	H	B	A	H	H	H	B	H	H	B	A	B	A	H
Bd4_1913415_80_F	Bd4	18.88	B	H	H	B	A	H	H	A	B	H	A	H	B	B	A	A	H	A	B	B	H	B	H	A	H	B	H	A	A	H	H	H	H	H	H	H	B	H	H	H	H	H	B	A	H	A	H
Bd4_3554157_80_F	Bd4	43.27	B	H	H	B	A	H	H	A	B	H	A	A	-	H	H	A	B	H	H	B	H	H	A	H	H	B	A	H	A	H	A	H	B	A	H	H	B	H	H	B	H	H	B	A	A	A	H
Bd4_4759498_80_F	Bd4	55.11	B	H	B	B	A	H	A	A	B	H	A	A	H	H	H	A	B	H	H	H	H	H	A	H	H	B	A	A	A	H	A	H	B	A	H	H	B	B	B	B	B	B	B	A	A	A	A
Bd4_7556538_80_F	Bd4	76.09	B	H	B	B	A	H	A	H	A	H	A	H	-	H	H	A	B	H	H	H	H	H	A	B	A	B	A	H	B	H	H	H	B	H	H	H	B	B	B	H	B	B	B	A	A	H	A
Bd4_9483521_60_F	Bd4	81.37	B	H	B	B	A	H	A	H	A	H	H	H	A	H	A	A	B	H	H	B	H	H	A	B	A	B	A	H	B	H	H	H	B	H	H	B	B	B	B	A	B	H	B	A	A	H	A
Bd4_14172446_80_R	Bd4	96.58	B	H	H	B	A	A	A	H	A	A	B	H	A	H	A	A	B	H	A	H	A	H	A	H	A	H	A	H	B	H	B	H	B	H	H	H	B	B	B	A	B	H	B	H	A	H	A
Bd4_24522164_80_F	Bd4	111.77	B	H	H	B	B	H	A	H	A	A	H	H	-	H	B	A	B	A	A	H	H	B	A	H	H	B	A	A	H	A	B	H	B	H	H	H	B	B	B	A	H	A	B	B	H	B	H
Bd4_29128782_60_R	Bd4	123.95	B	H	H	B	B	H	H	H	A	A	H	A	A	H	B	A	H	A	A	H	H	H	A	B	H	B	A	H	A	A	H	H	B	-	H	H	B	H	H	A	B	A	B	B	H	B	B
Bd4_31707586_80_F	Bd4	136.89	B	B	H	B	B	H	B	H	A	A	B	A	-	H	B	A	H	A	A	H	H	H	H	B	H	B	A	H	A	A	A	H	B	H	H	H	B	B	H	A	B	A	B	B	H	B	B
Bd4_35377284_80_F	Bd4	151.83	B	B	A	B	B	H	B	A	A	H	B	A	A	H	B	H	H	A	A	H	H	A	H	B	H	B	H	H	A	H	A	H	B	H	H	A	H	H	H	A	B	A	B	B	H	B	B
Bd4_38620266_80_F	Bd4	164.1	H	H	H	B	B	H	B	A	A	H	H	A	-	H	H	H	H	A	H	H	H	A	H	B	B	B	H	H	H	B	A	H	B	H	H	A	H	H	H	H	B	A	B	H	H	B	H
Bd4_40091965_80_F	Bd4	170.81	H	H	H	H	B	H	B	A	A	H	H	A	H	H	H	H	H	H	H	H	H	H	H	B	B	H	H	H	H	B	A	H	B	H	H	B	H	H	H	H	B	H	H	H	B	B	A
Bd4_42754753_80_F	Bd4	185.91	A	H	H	H	B	H	B	H	H	H	H	A	-	H	B	A	H	H	H	H	H	H	H	H	B	H	H	A	H	H	A	H	H	H	H	B	H	A	H	B	B	H	H	H	H	B	A
Bd4_44000740_80_F	Bd4	199.15	A	H	H	H	H	H	B	H	H	H	H	A	A	H	B	A	B	H	H	H	A	H	H	H	H	H	A	A	H	H	A	B	H	A	H	B	H	A	H	H	B	H	H	A	A	H	A
Bd4_46630990_80_F	Bd4	224	B	B	H	A	B	H	H	H	H	H	H	H	A	H	B	H	B	B	H	H	H	A	B	A	A	B	H	A	A	A	A	H	H	A	H	B	A	H	H	H	H	H	H	A	A	H	H
Bd4_48037322_80_F	Bd4	236.76	B	B	H	A	H	H	A	H	H	H	H	H	A	H	B	H	B	B	B	H	H	A	H	A	A	B	H	A	A	A	A	A	H	H	B	B	H	H	H	H	H	H	H	A	H	H	H
Bd5_640415_80_F	Bd5	0	H	B	H	A	H	H	H	H	H	B	A	H	H	H	H	H	H	B	H	H	H	A	H	B	B	H	H	A	H	H	H	H	H	H	H	H	B	H	H	A	A	B	H	B	H	H	B
Bd5_5068339_80_F	Bd5	27.16	H	B	A	H	A	H	H	H	H	B	A	H	B	B	H	H	H	B	H	B	H	A	H	H	B	H	H	A	B	H	A	A	B	B	A	H	B	B	H	H	A	H	B	H	B	A	B
Bd5_16209473_80_F	Bd5	47.3	A	H	A	H	A	H	H	A	B	B	A	B	-	B	H	H	H	B	A	A	H	H	H	A	H	H	H	H	B	H	H	A	B	B	A	H	H	H	H	H	H	H	B	H	B	A	B
Bd5_20712524_80_F	Bd5	64.8	H	H	H	H	A	H	H	A	B	B	H	H	-	H	H	H	A	B	A	H	H	A	B	A	H	H	H	H	B	B	H	A	H	B	A	H	B	A	H	H	A	H	B	H	B	A	B
Bd5_22201068_80_F	Bd5	79.01	B	H	B	H	H	H	H	A	B	H	H	H	H	B	B	H	A	H	A	H	H	A	B	A	H	H	H	B	B	B	H	A	H	B	A	H	B	A	H	H	A	H	B	H	H	H	B
Bd5_23723059_80_F	Bd5	92.16	B	H	B	B	H	B	H	A	B	H	H	H	H	B	H	A	A	H	A	B	B	A	B	A	A	H	A	B	B	B	H	H	H	H	A	H	B	A	H	H	A	H	B	H	H	H	H
Bd5_25055253_80_F	Bd5	107.37	B	H	H	H	H	H	H	A	A	H	H	A	-	B	H	A	H	A	A	B	H	A	B	A	A	B	A	B	B	H	H	H	A	H	H	H	B	H	H	H	H	A	B	H	H	H	A
Bd5_26182666_80_F	Bd5	122.44	B	H	H	H	A	H	H	A	A	B	H	A	A	H	H	A	H	H	H	A	H	H	B	A	A	B	A	B	H	H	H	B	A	H	H	B	H	H	B	H	H	A	B	H	H	H	A
Bd5_27436550_80_R	Bd5	143.77	H	A	H	A	A	H	H	B	A	B	H	A	-	H	H	H	H	H	H	A	H	H	H	H	H	B	A	B	A	H	A	B	H	H	B	B	H	B	B	A	H	A	B	B	H	H	A
“A” genotype calls refer to Luc1, “B” genotype calls to Jer1, “H” genotype calls to heterozygous markers, and “-“ to missing data points.
[truncated: 141 more columns]
