# Supplementary material for: The genetic architecture of colonization resistance in Brachypodium distachyon to non-adapted stripe rust (Puccinia striiformis) isolates
Source: PLOS journal article supplement (doi:10.1371/journal.pgen.1007637), 2018-09-28
Supplement: S11 (10.1371/journal.pgen.1007637.s011) [file journal.pgen.1007637.s011]

**Table S2.** Two cleaved amplified polymorphic sequences (CAPS) markers used to genotype Foz1 x Luc1 and Luc1 x Jer1 F<sub>1</sub> plants. Markers are adapted from Barbieri *et al.* 2012.

| Cross       | Marker       | Primers (forward; reverse)                    | Temp. <sup>1</sup> | Restriction enzyme |
|-------------|--------------|-----------------------------------------------|--------------------|--------------------|
| Foz1 x Luc1 | Bradi4g10930 | GGTTGAGTTATTGCCGTCAG;<br>CGCCTTTGGATCTACCAGTC | 56°C               | MseI               |
| Luc1 x Jer1 | Bradi4g10930 | GGTTGAGTTATTGCCGTCAG;<br>CGCCTTTGGATCTACCAGTC | 56°C               | MboI               |

<sup>1</sup>Annealing temperature
